# Supplementary material for: Pulsed Electromagnetic Fields Induce Skeletal Muscle Cell Repair by Sustaining the Expression of Proteins Involved in the Response to Cellular Damage and Oxidative Stress
Source: MDPI journal article supplement (doi:10.3390/ijms242316631), 2023-11-23
Supplement: s1 [file s1]

Supplementary Table S1. Gene ontology (GO) enrichment analysis showing the most significant biological processes in which PEMF modulated proteins were involved.

| #term ID   | term description                                                                           | observed | ger background | ξ strength | false discover | matching proteins in the nnetwork             |
|------------|--------------------------------------------------------------------------------------------|----------|----------------|------------|----------------|-----------------------------------------------|
| GO:0006979 | Response to oxidative stress                                                               | 6        | 368            | 1.51       | 0.00014        | SIRT2,EPAS1,HSPA1A,MAPK8,SOD2,PON2            |
| GO:0034599 | Cellular response to oxidative stress                                                      | 5        | 224            | 1.64       | 0.00038        | SIRT2,EPAS1,HSPA1A,MAPK8,SOD2                 |
| GO:0009628 | Response to abiotic stimulus                                                               | 7        | 1107           | 1.1        | 0.00073        | SIRT2,EPAS1,TXN,HSPA1A,MAPK8,CDKN1A,SOD2      |
| GO:2000377 | Regulation of reactive oxygen species metabolic process                                    | 4        | 143            | 1.74       | 0.0019         | SIRT2,PON3,CDKN1A,SOD2                        |
| GO:0043618 | Regulation of transcription from RNA polymerase II promoter in response to stress          | 3        | 49             | 2.08       | 0.0054         | SIRT2,EPAS1,HSPA1A                            |
| GO:0009636 | Response to toxic substance                                                                | 4        | 229            | 1.54       | 0.0074         | PON3,TXN,SOD2,PON2                            |
| GO:0051173 | Positive regulation of nitrogen compound metabolic process                                 | 8        | 3166           | 0.7        | 0.0259         | SIRT2,EPAS1,CYCS,TXN,HSPA1A,MAPK8,CDKN1A,SOD2 |
| GO:0051098 | Regulation of binding                                                                      | 4        | 375            | 1.32       | 0.0404         | SIRT2,TXN,MAPK8,CDKN1A                        |
| GO:0051101 | Regulation of DNA binding                                                                  | 3        | 124            | 1.68       | 0.0404         | SIRT2,TXN,MAPK8                               |
| GO:0051247 | Positive regulation of protein metabolic process                                           | 6        | 1512           | 0.89       | 0.0404         | SIRT2,CYCS,TXN,HSPA1A,MAPK8,CDKN1A            |
| GO:0097201 | Negative regulation of transcription from RNA polymerase II promoter in response to stress | 2        | 14             | 2.45       | 0.0404         | SIRT2,HSPA1A                                  |
| GO:0031399 | Regulation of protein modification process                                                 | 6        | 1560           | 0.88       | 0.0443         | SIRT2,EPAS1,TXN,HSPA1A,MAPK8,CDKN1A           |
| GO:0033554 | Cellular response to stress                                                                | 6        | 1572           | 0.88       | 0.0443         | SIRT2,EPAS1,HSPA1A,MAPK8,CDKN1A,SOD2          |
| GO:0044093 | Positive regulation of molecular function                                                  | 6        | 1587           | 0.87       | 0.0443         | SIRT2,CYCS,TXN,HSPA1A,MAPK8,CDKN1A            |
| GO:0007005 | Mitochondrion organization                                                                 | 4        | 445            | 1.25       | 0.0458         | EPAS1,HSPA1A,MAPK8,SOD2                       |
| GO:0009314 | Response to radiation                                                                      | 4        | 444            | 1.25       | 0.0458         | TXN,MAPK8,CDKN1A,SOD2                         |
| GO:0010941 | Regulation of cell death                                                                   | 6        | 1651           | 0.85       | 0.0458         | SIRT2,TXN,HSPA1A,MAPK8,CDKN1A,SOD2            |
| GO:0031667 | Response to nutrient levels                                                                | 4        | 461            | 1.23       | 0.0458         | SIRT2,MAPK8,CDKN1A,SOD2                       |
| GO:0051246 | Regulation of protein metabolic process                                                    | 7        | 2622           | 0.72       | 0.0458         | SIRT2,EPAS1,CYCS,TXN,HSPA1A,MAPK8,CDKN1A      |
| GO:0070887 | Cellular response to chemical stimulus                                                     | 7        | 2609           | 0.72       | 0.0458         | SIRT2,EPAS1,PON3,TXN,HSPA1A,MAPK8,SOD2        |
| GO:0097193 | Intrinsic apoptotic signaling pathway                                                      | 3        | 166            | 1.55       | 0.0465         | CYCS,CDKN1A,SOD2                              |
| GO:1904706 | Negative regulation of vascular associated smooth muscle cell proliferation                | 2        | 25             | 2.2        | 0.0487         | CDKN1A,SOD2                                   |
